# Supplementary material for: Disposable Electrochemical Biosensor Based on the Inhibition of Alkaline Phosphatase Encapsulated in Acrylamide Hydrogels
Source: MDPI journal article supplement (doi:10.3390/bios12090698), 2022-08-29
Supplement: s1 [file s1]

Supporting information for

# Disposable Electrochemical Biosensor Based on the Inhibition of Alkaline Phosphatase Encapsulated in Acrylamide Hydrogels

Yolanda Alacid <sup>1</sup>, Andrés F. Quintero Jaime <sup>2</sup>, María José Martínez-Tomé <sup>1</sup>, C. Reyes Mateo <sup>1</sup> and Francisco Montilla <sup>2,\*</sup>

<sup>1</sup> Instituto de Investigación, Desarrollo e Innovación en Biotecnología Sanitaria de Elche (IDiBE), Universidad Miguel Hernández, Avenida de la Universidad, s/n. 03202 Elche, Alicante, Spain

<sup>2</sup> Departamento de Química Física and Instituto Universitario de Materiales de Alicante (IUMA), Universidad de Alicante, Carretera San Vicente s/n, 03690 Alicante, Spain

\* Correspondence: francisco.montilla@ua.es

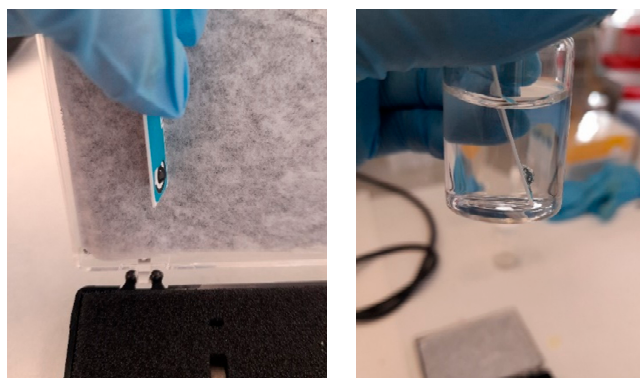

**Figure S1.** Photographic images of the AETAC hydrogels adhered to the working electrode of the SPE.

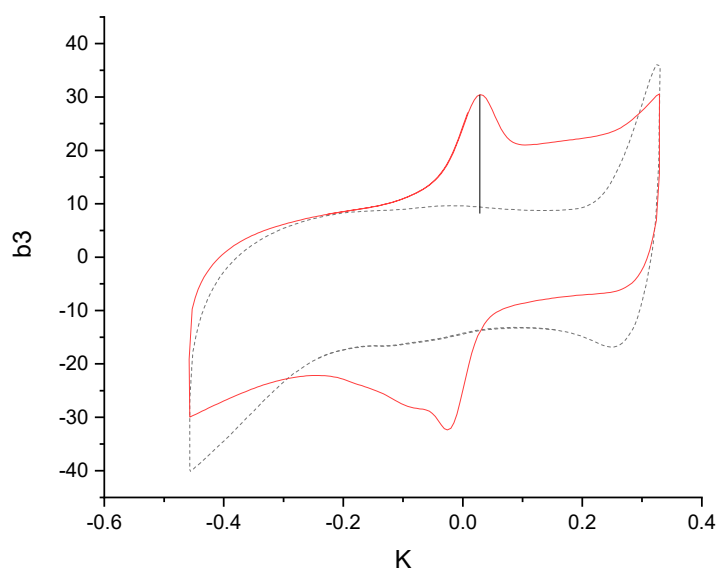

---

**Figure S2.** Cyclic voltammograms recorded with *ALP@AETAC*-modified electrode in a solution of 0.5 mM HQ2P in trizma buffer solution containing sodium chloride (50 mM), sodium sulphate (50 mM) and sodium nitrate (50 mM). Dashed line: Initial voltammogram in the presence of the substrate. Solid line: After 20 min of the addition of the substrate.
